# Supplementary material for: Free and Conjugated Phenolic Profiles and Antioxidant Activity in Quinoa Seeds and Their Relationship with Genotype and Environment
Source: MDPI journal article supplement (doi:10.3390/plants10061046), 2021-05-21
Supplement: s1 [file s1]

**Table 1S.** Common and IUPAC names of the phenolic compounds analysed in the study.

| Common name                                        | IUPAC name                                                                                                                                                                                                                                                       |
|----------------------------------------------------|------------------------------------------------------------------------------------------------------------------------------------------------------------------------------------------------------------------------------------------------------------------|
| 4-Hydroxybenzoic acid or <i>p</i> -Salycilic acid  | 4-Hydroxybenzoic acid                                                                                                                                                                                                                                            |
| Gallic acid                                        | 3,4,5-Trihydroxybenzoic acid                                                                                                                                                                                                                                     |
| Caffeic acid                                       | ( <i>E</i> )-3-(3,4-Dihydroxyphenyl)prop-2-enoic acid                                                                                                                                                                                                            |
| Chlorogenic acid                                   | (1 <i>S</i> ,3 <i>R</i> ,4 <i>R</i> ,5 <i>R</i> )-3-[( <i>E</i> )-3-(3,4-Dihydroxyphenyl)prop-2-enoyl]oxy-1,4,5-trihydroxycyclohexane-1-carboxylic acid                                                                                                          |
| Ferulic acid                                       | ( <i>E</i> )-3-(4-Hydroxy-3-methoxyphenyl)prop-2-enoic acid                                                                                                                                                                                                      |
| <i>p</i> -Coumaric acid                            | ( <i>E</i> )-3-(4-Hydroxyphenyl)prop-2-enoic acid                                                                                                                                                                                                                |
| Sinapic acid                                       | ( <i>E</i> )-3-(4-Hydroxy-3,5-dimethoxyphenyl)prop-2-enoic acid                                                                                                                                                                                                  |
| Syringic acid                                      | 4-Hydroxy-3,5-dimethoxybenzoic acid                                                                                                                                                                                                                              |
| <i>trans</i> -Cinnamic acid                        | ( <i>E</i> )-3-Phenylprop-2-enoic acid                                                                                                                                                                                                                           |
| Vanillic acid                                      | 4-Hydroxy-3-methoxybenzoic acid                                                                                                                                                                                                                                  |
| Quercetin                                          | 2-(3,4-Dihydroxyphenyl)-3,5,7-trihydroxychromen-4-one                                                                                                                                                                                                            |
| Isoquercetin or Quercetin-3- <i>O</i> -glucoside   | 2-(3,4-Dihydroxyphenyl)-5,7-dihydroxy-3-[(2 <i>S</i> ,3 <i>R</i> ,4 <i>S</i> ,5 <i>S</i> ,6 <i>R</i> )-3,4,5-trihydroxy-6-(hydroxymethyl)oxan-2-yl]oxychromen-4-one                                                                                              |
| Rutin or Quercetin-3- <i>O</i> -rutinoside         | 2-(3,4-Dihydroxyphenyl)-5,7-dihydroxy-3-[(2 <i>S</i> ,3 <i>R</i> ,4 <i>S</i> ,5 <i>S</i> ,6 <i>R</i> )-3,4,5-trihydroxy-6-[(2 <i>R</i> ,3 <i>R</i> ,4 <i>R</i> ,5 <i>R</i> ,6 <i>S</i> )-3,4,5-trihydroxy-6-methyloxan-2-yl]oxymethyl]oxan-2-yl]oxychromen-4-one |
| Hyperoside or Quercetin-3- <i>O</i> -galactoside   | 2-(3,4-Dihydroxyphenyl)-5,7-dihydroxy-3-[(2 <i>S</i> ,3 <i>R</i> ,4 <i>S</i> ,5 <i>R</i> ,6 <i>R</i> )-3,4,5-trihydroxy-6-(hydroxymethyl)oxan-2-yl]oxychromen-4-one                                                                                              |
| Kaempferol                                         | 3,5,7-Trihydroxy-2-(4-hydroxyphenyl)chromen-4-one                                                                                                                                                                                                                |
| Nicotiflorin or Kaempferol-3- <i>O</i> -rutinoside | 5,7-Dihydroxy-2-(4-hydroxyphenyl)-3-[(2 <i>S</i> ,3 <i>R</i> ,4 <i>S</i> ,5 <i>S</i> ,6 <i>R</i> )-3,4,5-trihydroxy-6-[(2 <i>R</i> ,3 <i>R</i> ,4 <i>R</i> ,5 <i>R</i> ,6 <i>S</i> )-3,4,5-trihydroxy-6-methyloxan-2-yl]oxymethyl]oxan-2-yl]oxychromen-4-one     |
| Catechin                                           | (2 <i>R</i> ,3 <i>S</i> )-2-(3,4-Dihydroxyphenyl)-3,4-dihydro-2 <i>H</i> -chromene-3,5,7-triol                                                                                                                                                                   |
| Epicatechin                                        | (2 <i>R</i> ,3 <i>R</i> )-2-(3,4-Dihydroxyphenyl)-3,4-dihydro-2 <i>H</i> -chromene-3,5,7-triol                                                                                                                                                                   |
| Daidzein                                           | 7-Hydroxy-3-(4-hydroxyphenyl)chromen-4-one                                                                                                                                                                                                                       |
| Genistein                                          | 5,7-dihydroxy-3-(4-hydroxyphenyl)chromen-4-one                                                                                                                                                                                                                   |
